# Supplementary material
Source: publisher site journal article supplement (https://www.dovepress.com/article/264683)
Supplement: Supplementary file 1 [file get_supplementary_file.php]

**Supplementary Tables**

**Supplementary Table 1.** Surgical codes identifying hip arthroscopy - surgical codes recommended by the Danish National Board of Health (March 2018)

| Codes |  |
| --- | --- |
| KNFA01 | Endoscopic exploration of soft tissue of the hip or thigh |
| KNFA01A | Endoscopic exploration of soft tissue of the hip |
| KNFA01B | Endoscopic exploration of soft tissue of the thigh |
| KNFA11 | Arthroscopic exploratory surgery of the hip joint |
| KNFA11B | Diagnostic arthroscopy of the hip joint |
| KNFA21 | Endoscopic soft tissue or joint biopsy of the hip or thigh |
| KNFA21A | Endoscopic joint biopsy of the hip |
| KNFA21B | Endoscopic soft tissue biopsy of the thigh |
| KNFA21C | Endoscopic soft tissue biopsy of the hip |
| KNFA31 | Endoscopic biopsy of the femur |
| KNFE91 | Endoscopic surgery of the ligament or capsule of the hip |
| KNFF01 | Arthroscopic total synovectomy of the hip |
| KNFF11 | Arthroscopic partial synovectomy of the hip |
| KNFF21 | Arthroscopic fixation of joint fragments of the hip |
| KNFF31 | Arthroscopic resection of cartilage of the hip |
| KNFF91 | Other endoscopic surgery of ligament or capsule of the hip |
| KNFH01 | Arthroscopic reposition of the hip joint |
| KNFH21 | Arthroscopic reposition of luxated prosthesis of the hip |
| KNFH31 | Arthroscopic surgery of adhesions in the hip joint |
| KNFH41 | Arthroscopic removal of loose fragments or foreign objects of the hip |
| KNFH51 | Arthroscopic resection of intra-articular exostoses or osteophytes in the hip joint |
| KNFH71 | Arthroscopic surgery for habitual luxation of the hip |
| KNFH91 | Other arthroscopic surgery of the hip |
| KNFH91A | Arthroscopic partial resection of the labrum |
| KNFH91B | Arthroscopic reinsertion of the labrum |
| KNFH91C | Arthroscopic primary reconstruction of the labrum using iliotibial band tissue |
| KNFH91D | Arthroscopic primary reconstruction of the labrum (autograft) |
| KNFH91E | Arthroscopic secondary reconstruction of the labrum using iliotibial band tissue |
| KNFH91F | Arthroscopic secondary reconstruction of the labrum (autograft) |
| KNFH91G | Arthroscopic primary reconstruction of the labrum (allograft) |
| KNFH91H | Arthroscopic secondary reconstruction of the labrum (allograft) |

**Supplementary Table 2.** Surgical codes identifying hip arthroscopy - additional codes used by surgeons performing hip arthroscopies in Denmark

| Codes |  | Description by surgeons |
| --- | --- | --- |
| KNEK19 | Resection or excision of osseous tissue of the pelvis | Used with rimtrimming |
| KNEK29 | Fenestration or inforation of the pelvis (acetabulum) | Used with acetabular microfracture |
| KNFE91 | Endoscopic surgery of the capsule or ligament (hip or thigh) | Used when capsule suturing |
| KNFK29 | Fenestration or information of the femur (femoral head) | Used with femoral head microfracture |
| KNFL39 | Myotomy or tenotomy of the hip or thigh | Used with psoas tenotomy |
| KNFL49 | Suturing / re-insertion of tendon in the hip or thigh |  |
| KNFL59 | Tenolysis/tenosynovectomy of the hip or thigh |  |
| KNFL69 | Fixation, elongation or shortening of tenson (hip or thigh) | Used with tendon elongation |
| KNFL99 | Other surgical procedure of the muscle or tendon (hip or thigh) | Used with osteophyte excision |
| KNFM19 | Resection or excision of fascia of the hip or thigh | Used with arthroscopic iliotibial band (z-plastik) |
| KNFM79 | Excision of bursae in the hip or thigh |  |
| KNFM99 | Other surgery of the fascia, bursae, ganglia of the hip or thigh | Used with ganglia excision |
| KNFS19 | Incision and revision following infection of the hip joint | Used with revision following infection |
| KNFS99 | Other: Surgery following infection of the tendon, joint or bone in the hip or thigh | Used with additional surgery following infection |

**Supplementary Table 3.** Description of Hip Sports Activity Scale (HSAS) categories

| HSAS 1 | No recreational or competitive sport |
| --- | --- |
| HSAS 2 | Recreational sport (swimming, cycling, hiking, Nordic walking) |
| HSAS 3 | Recreational sport (golf, bicycle racing, mountain biking, swimming, rowing,  cross-country skiing / biathlon, dancing, inline skating) |
| HSAS 4 | Recreational sport (aerobics, jogging, lower extremity weight-training,  horseback riding, cricket) |
| HSAS 5 | Recreational sport (tennis, downhill skiing, snowboarding, Indoor sports,  baseball/softball) |
| HSAS 6 | Competitive sports (golf, bicycle racing, mountain biking, swimming, rowing,  cross-country skiing / biathlon, horseback riding, cricket)  Recreational sports (soccer, ice hockey, field hockey, American football/rugby,  martial arts, track-and-field, beach-volleyball, lacrosse) |
| HSAS 7 | Competitive sports (elite level: golf, bicycle racing, mountain biking, swimming, rowing,  cross-country skiing / biathlon, horseback riding, cricket; minor league: downhill skiing, snowboarding) |
| HSAS 8 | Competitive sports (elite level: downhill skiing, snowboarding; minor league: soccer, ice hockey, field hockey, American football/rugby, martial arts, tennis, track-and-field, Indoor sports, beach-volleyball, lacrosse, baseball/softball) |
| HSAS 9 | Competitive sports elite level (soccer, ice hockey, field hockey, American football/rugby,  martial arts, tennis, track-and-field, Indoor sports, beach-volleyball, lacrosse,  baseball/softball) |
